# Supplementary material for: Resampling-Based Approaches to Study Variation in Morphological Modularity
Source: PubMed Central journal article supplement (PMC3712944; doi:10.1371/journal.pone.0069376), 2013-07-16

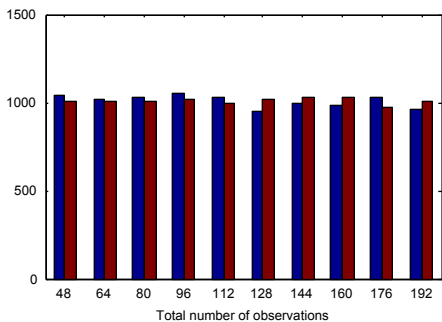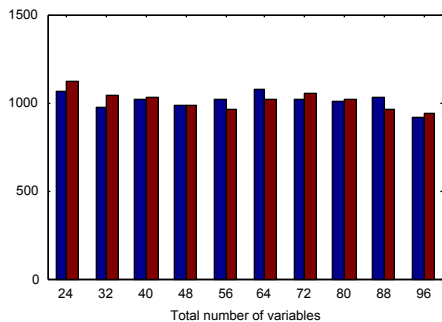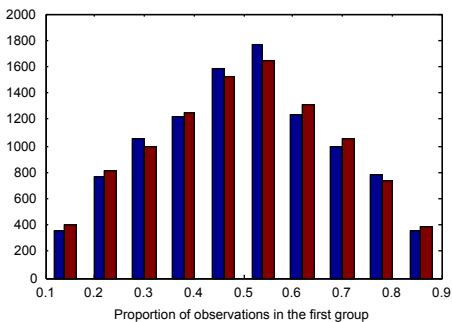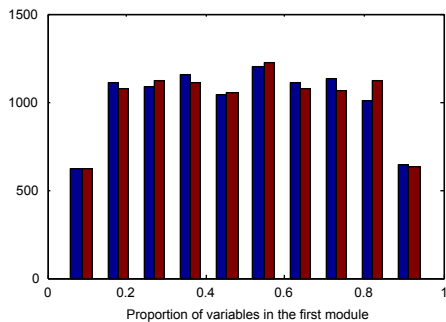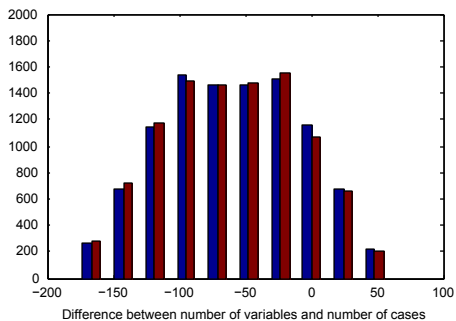

Supplement: pone.0069376.s002.pdf [file pone.0069376.s002.pdf]
